# Supplementary material
Source: PubMed Central journal article supplement (PMC4391571)
Supplement: 8c2bbee880809d7ad3038572824de8ff_genetics.115.174698-3.pdf [file 8c2bbee880809d7ad3038572824de8ff_genetics.115.174698-3.pdf]

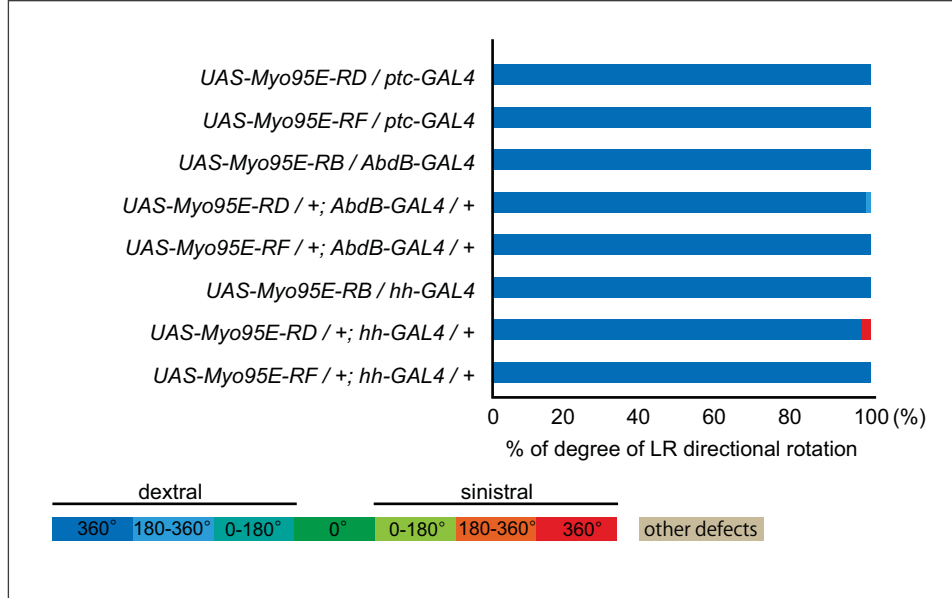

**Figure S4** LR phenotypes of male genitalia under the overexpression of *Myo95E* isoforms. The overexpression of *Myo95E-RB*, *-RD*, and *-RF* driven by *ptc-GAL4*, *Abd-B-GAL4*, and *hh-GAL4* are shown. Bar graphs show the frequency (%) of dextral and sinistral rotation phenotypes observed in the male genital plate, color coded according to the categories shown at the bottom. Genotypes are indicated at left.
