# Supplementary material
Source: PubMed Central journal article supplement (PMC4391571)
Supplement: 66f4606d14f148f9513fcd460a510648_genetics.115.174698-5.pdf [file 66f4606d14f148f9513fcd460a510648_genetics.115.174698-5.pdf]

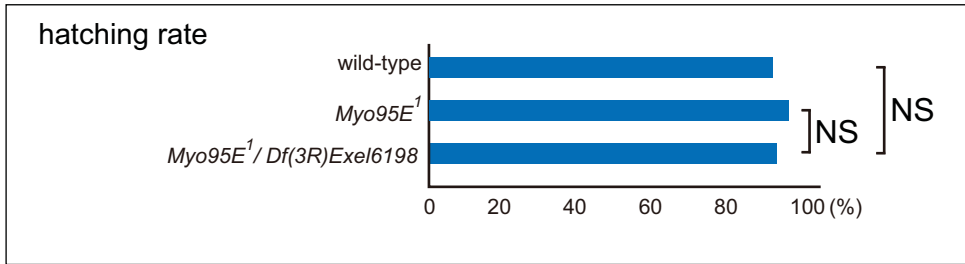

**Figure S3** Hatching rate of wild-type, *Myo95E<sup>1</sup>* homozygous, and *Myo95E<sup>1</sup>/Df(3R)Exel6198* trans-heterozygous flies. Bar graph depicts the hatching rate. *Df(3R)Exel6198* is a deletion mutant uncovering the *Myo95E* locus. Genotypes are indicated at left. NS: not significant by t-test.
