# Supplementary material
Source: PubMed Central journal article supplement (PMC4391571)
Supplement: 74dceaf531a2d64c17bae49a9d03af49_genetics.115.174698-1.pdf [file 74dceaf531a2d64c17bae49a9d03af49_genetics.115.174698-1.pdf]

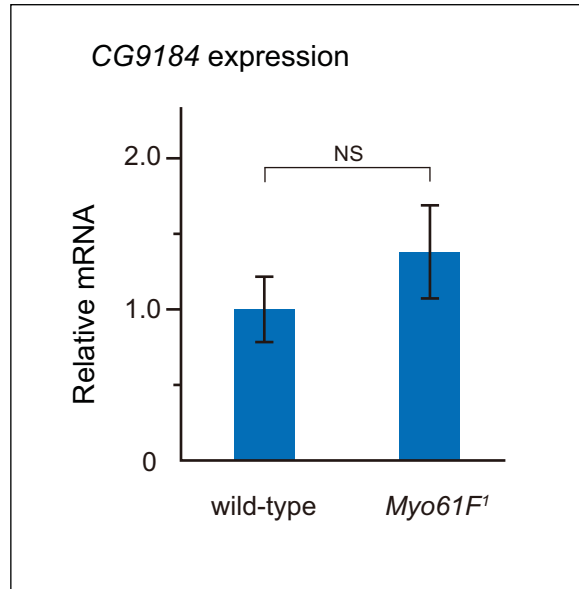

**Figure S1** Expression of *CG9184* in wild-type or *Myo61F<sup>1</sup>* homozygous pupae 23-25 h after pupation, quantified by real-time PCR. The amount of *CG9184* transcript was normalized to that of *Gapdh1*. The amount of *CG9184* transcript relative to that of wild-type (adjusted to 1.0) is shown. Average values of triplicate determinations are shown. NS: not significant by t-test.

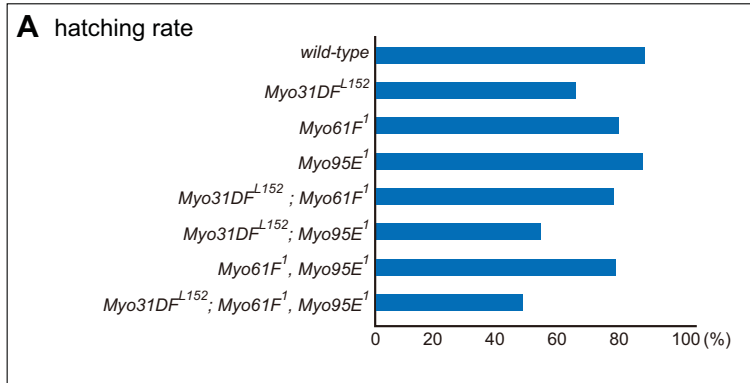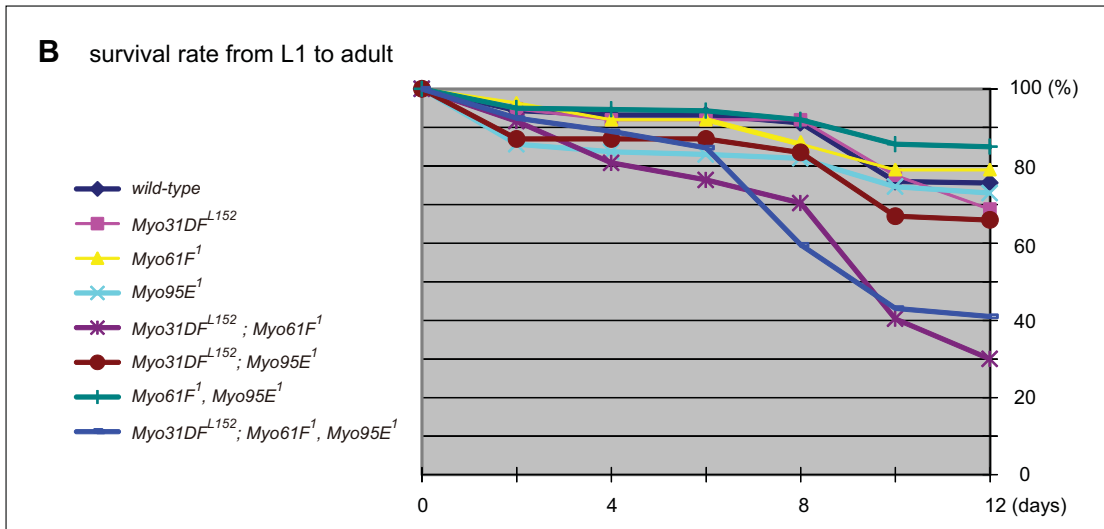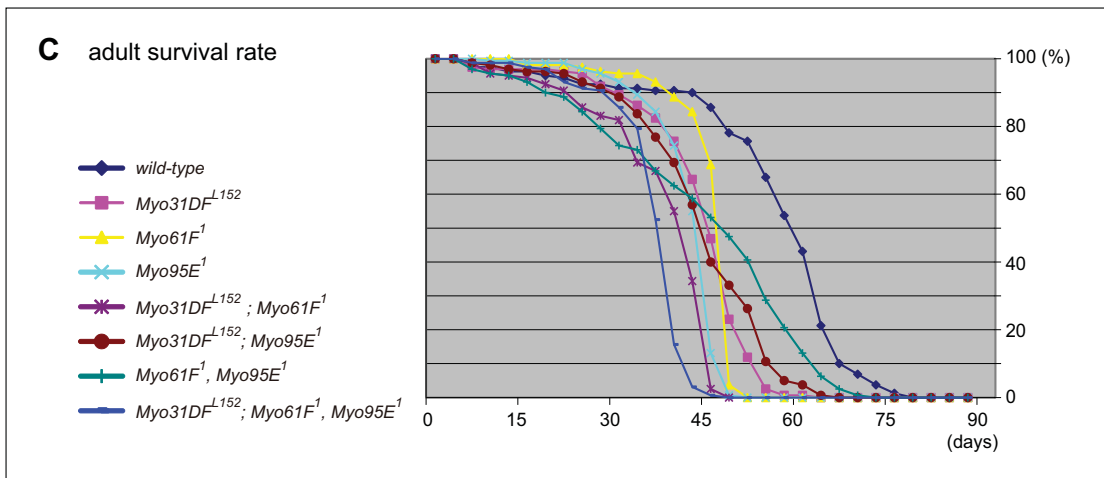

**Figure S2** Hatching and survival rates of class I myosin mutants. (A) Bar graph depicting hatching rates. (B and C) Line graphs depicting first-instar larva to adult survival rates (B) and adult survival rates (C). Genotypes are indicated at left.

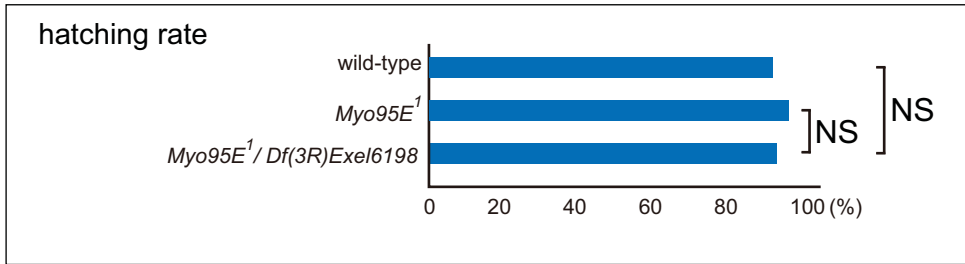

**Figure S3** Hatching rate of wild-type, *Myo95E<sup>1</sup>* homozygous, and *Myo95E<sup>1</sup>/Df(3R)Exel6198* trans-heterozygous flies. Bar graph depicts the hatching rate. *Df(3R)Exel6198* is a deletion mutant uncovering the *Myo95E* locus. Genotypes are indicated at left. NS: not significant by t-test.

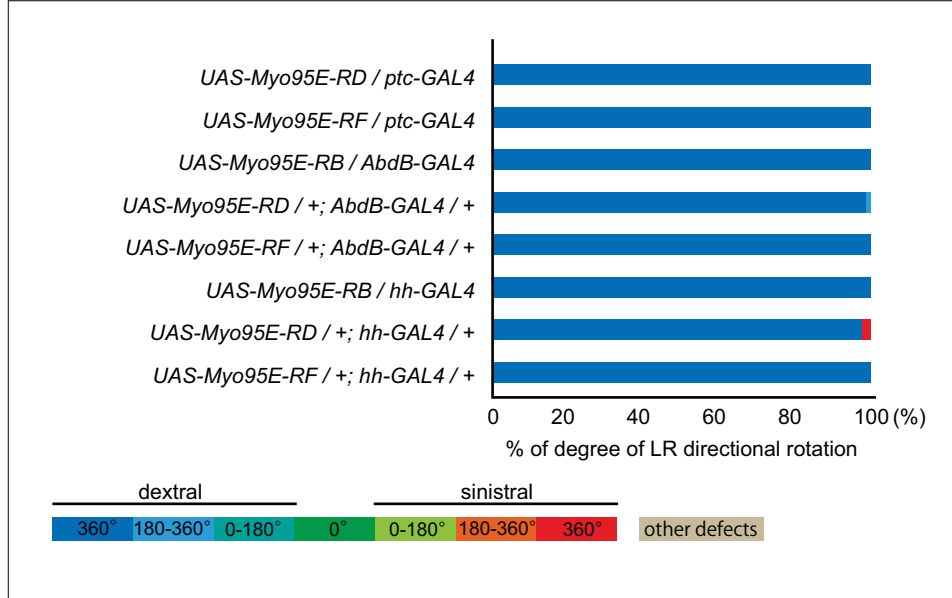

**Figure S4** LR phenotypes of male genitalia under the overexpression of *Myo95E* isoforms. The overexpression of *Myo95E-RB*, *-RD*, and *-RF* driven by *ptc-GAL4*, *Abd-B-GAL4*, and *hh-GAL4* are shown. Bar graphs show the frequency (%) of dextral and sinistral rotation phenotypes observed in the male genital plate, color coded according to the categories shown at the bottom. Genotypes are indicated at left.
