# Supplementary material
Source: PubMed Central journal article supplement (PMC4391571)
Supplement: a170ad391346e2022fc70da911f5060d_genetics.115.174698-4.pdf [file a170ad391346e2022fc70da911f5060d_genetics.115.174698-4.pdf]

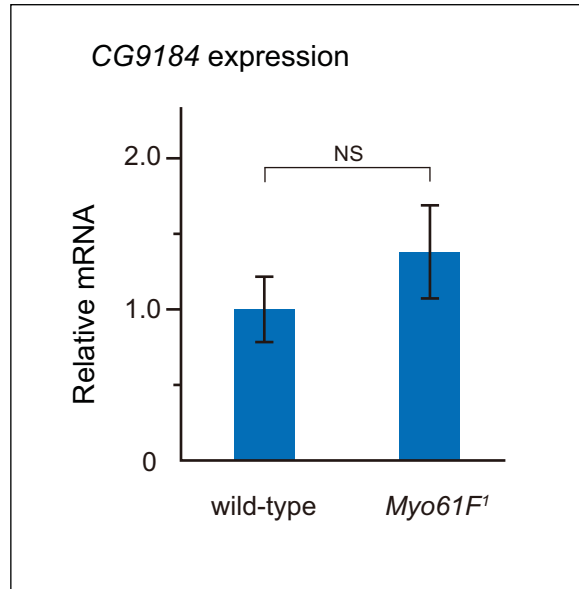

**Figure S1** Expression of *CG9184* in wild-type or *Myo61F<sup>1</sup>* homozygous pupae 23-25 h after pupation, quantified by real-time PCR. The amount of *CG9184* transcript was normalized to that of *Gapdh1*. The amount of *CG9184* transcript relative to that of wild-type (adjusted to 1.0) is shown. Average values of triplicate determinations are shown. NS: not significant by t-test.
