# Supplementary material
Source: PubMed Central journal article supplement (PMC4391571)
Supplement: fe78a9ccfce5d794c0d49eecb3d42e33_genetics.115.174698-2.pdf [file fe78a9ccfce5d794c0d49eecb3d42e33_genetics.115.174698-2.pdf]

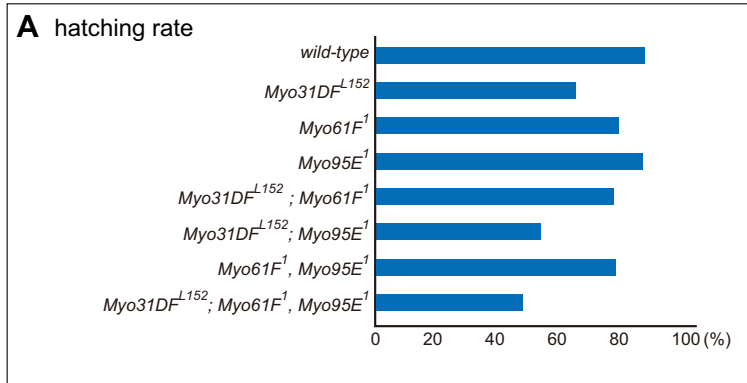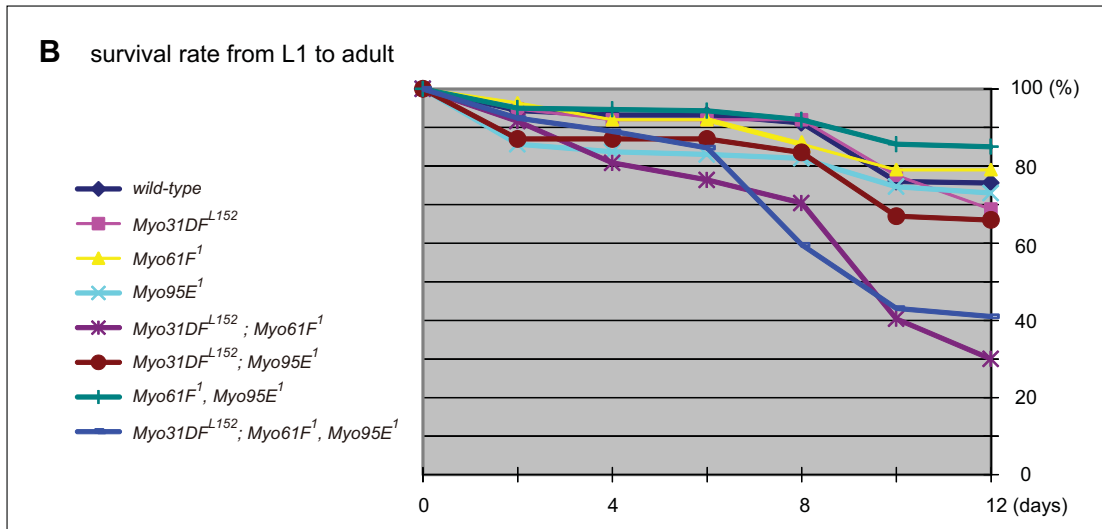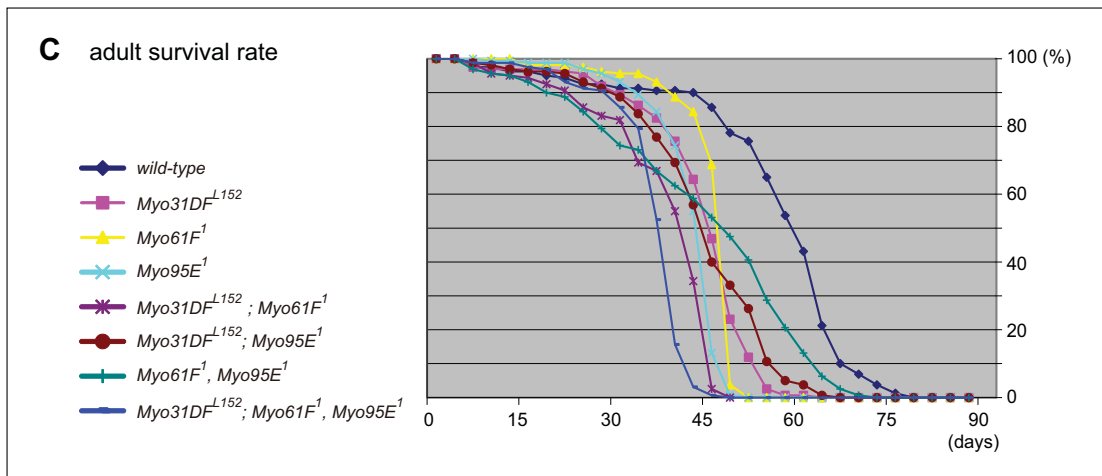

**Figure S2** Hatching and survival rates of class I myosin mutants. (A) Bar graph depicting hatching rates. (B and C) Line graphs depicting first-instar larva to adult survival rates (B) and adult survival rates (C). Genotypes are indicated at left.
